# Supplementary material
Source: PubMed Central journal article supplement (PMC3744099)
Supplement: NIHMS496166-supplement-Supplemental.pdf [file NIHMS496166-supplement-Supplemental.pdf]

# Supplementary material for: Cure Models as a Useful Statistical Tool for Analyzing Survival

Megan Othus<sup>1</sup>, Bart Barlogie<sup>2</sup>, Michael L. LeBlanc<sup>1</sup>, John J. Crowley<sup>3</sup>

<sup>1</sup> Fred Hutchinson Cancer Research Center, Seattle WA

<sup>2</sup> Myeloma Institute for Research and Therapy, University of Arkansas for Medical Sciences, Little Rock, AR

<sup>3</sup> Cancer Research And Biostatistics, Seattle, WA

**Acknowledgement of support:** This work was supported by the Hope Foundation (Othus) and the National Cancer Institute (grant CA090998; LeBlanc, Crowley, Othus).

**Corresponding author:** Megan Othus, PhD, Fred Hutchinson Cancer Research Center 1100 Fairview Ave NW, M3-C102, Seattle, WA 98117. Tel: 206-667-5749. Email: mothus@fhcrc.org

**Disclaimers:** no conflicts of interest

## Supplementary material

For results with the Weibull mixture cure model we assumed the following survival model:

$$S(t) = \exp(\gamma'X)/(1 + \exp[\gamma'X]) + 1/(1 + \exp[\gamma X]) \exp(-[\exp\{\beta'Z\}t]^\lambda),$$

where  $X$  is a vector of covariates associated with the long-term survivor component of the model,  $Z$  is a vector of covariates associated with the short-term survival component of the model,  $\gamma$  and  $\beta$  are parameter vectors associated with  $X$  and  $Z$ , and  $\lambda$  is the shape parameter of the Weibull model. In this model both  $X$  and  $Z$  include an intercept term.  $X$  and  $Z$  may share some, none, or all covariates. In all models presented, we took  $X = Z$ .

For results with the Weibull non-mixture cure model we assumed the following survival model:

$$S(t) = \exp[-\exp(\alpha'W)(1 - [\exp\{\eta'Y\}t]^\kappa)],$$

where  $W$  is a vector of covariates associated with the long-term survivor component of the model,  $Y$  is a vector of covariates associated with the short-term survival component of the model,  $\alpha$  and  $\eta$  are parameter vectors associated with  $W$  and  $Y$ , and  $\kappa$  is the shape parameter of the Weibull model. In this model both  $W$  and  $Y$  include an intercept term.  $W$  and  $Y$  may share some, none, or all covariates. In all models presented, we took  $W = Y$ .

For interested readers, the full results of Tables 2 and 3 on the coefficient scale (in contrast to the OR and HR scale) are provided below.

Table S.1: Weibull mixture cure model regression results

|                                        | Estimate | 95% CI          | P-value |
|----------------------------------------|----------|-----------------|---------|
| Long-term survivor model coefficients  |          |                 |         |
| Intercept                              | -0.66    | (-1.91, 0.60)   | 0.303   |
| TT1 (ref)                              |          |                 |         |
| TT2-                                   | 0.86     | (0.57, 1.66)    | 0.036   |
| TT2+                                   | 1.55     | (0.80, 2.32)    | <0.001  |
| TT3                                    | 3.01     | (2.21, 3.80)    | <0.001  |
| Age                                    | -0.03    | (-0.05, -0.005) | 0.018   |
| CA                                     | -0.66    | (-1.38,-0.35)   | 0.001   |
| Short-term survival model coefficients |          |                 |         |
| Intercept                              | -1.65    | (-2.21, -1.09)  | <0.001  |
| TT1 (ref)                              |          |                 |         |
| TT2-                                   | -0.26    | (-0.52, 0.003)  | 0.052   |
| TT2+                                   | -0.41    | (-0.74, -0.07)  | 0.017   |
| TT3                                    | -0.08    | (-0.66, 0.50)   | 0.78    |
| Age                                    | 0.01     | (-0.004, 0.02)  | 0.25    |
| CA                                     | 0.34     | (0.14, 0.55)    | 0.001   |
| Shape                                  | 0.10     | (0.02, 0.18)    | 0.011   |

Table S.2: Weibull non-mixture cure model regression results

|                                         | Estimate | 95% CI         | P-value |
|-----------------------------------------|----------|----------------|---------|
| Long-term survivor model coefficients   |          |                |         |
| Intercept                               | 0.16     | (-0.77, 1.10)  | 0.74    |
| TT1 (ref)                               |          |                |         |
| TT2-                                    | -0.16    | (-0.72, 0.40)  | 0.57    |
| TT2+                                    | -0.70    | (-1.17, -0.23) | 0.003   |
| TT3                                     | -1.70    | (-2.23, -1.18) | <0.001  |
| Age                                     | 0.01     | (-0.004, 0.03) | 0.16    |
| CA                                      | 0.41     | (0.07, 0.76)   | 0.02    |
| Short-term survival model coefficients) |          |                |         |
| Intercept                               | -2.14    | (-3.22, -1.07) | <0.001  |
| TT1 (ref)                               |          |                |         |
| TT2-                                    | -0.33    | (-0.94, 0.28)  | 0.29    |
| TT2+                                    | -0.12    | (-0.67, 0.42)  | 0.66    |
| TT3                                     | 0.54     | (-0.10, 1.19)  | 0.10    |
| Age                                     | 0.003    | (-0.02, 0.02)  | 0.25    |
| CA                                      | 0.17     | (-0.23, 0.56)  | 0.40    |
| Shape                                   | 0.18     | (0.09, 0.26)   | <0.001  |
